# Supplementary material for: A replication-incompetent adenoviral vector encoding for HSV-2 gD2 is immunogenic and protective against HSV-2 intravaginal challenge in mice
Source: PubMed Central journal article supplement (PMC11687876; doi:10.1371/journal.pone.0310250), 2024-12-31
Supplement: pone.0310250.s002.pdf [file pone.0310250.s002.pdf]

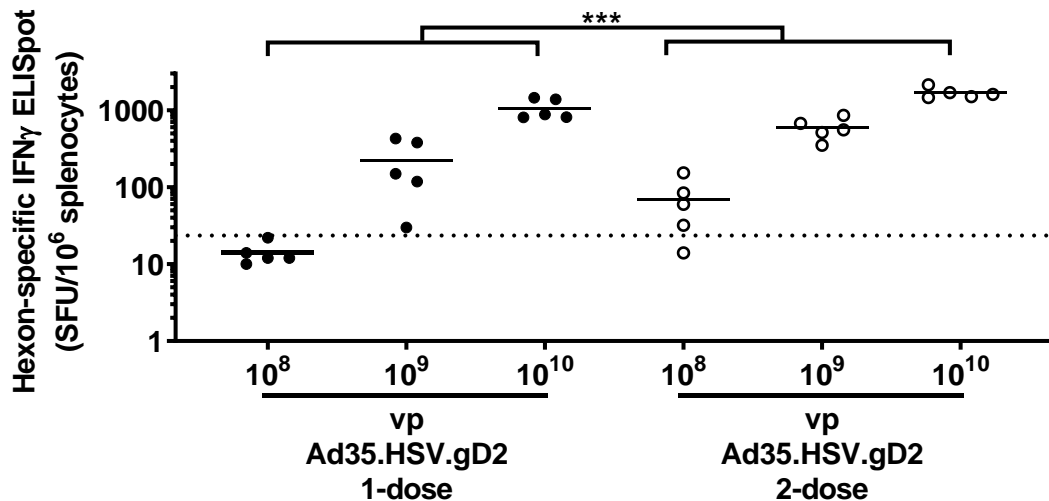

**Supplementary Figure 2. IFN $\gamma$  ELISpot responses against Ad35 surface antigen Hexon were measured as a control in the assay.**

Female BALB/c mice were immunized intramuscularly once (T=0d) or twice (T=0d and T=28d) 10<sup>8</sup> to 10<sup>10</sup> vp/mouse with Ad35.HSV.gD2 (N=5/group) or twice (T=0d and T=28d) with 7x10<sup>5</sup> pfu/mouse CJ2-gD2 (N=5) or mock immunized with formulation buffer (N=5) and sacrificed 6 weeks after the first immunization. Cellular immune responses were assessed by IFN- $\gamma$  ELISpot on splenocytes harvested from BALB/c mice (T=42d). Ad35.HSV.gD2 splenocytes were stimulated with an Ad35 immunodominant hexon peptide (9-mer: KYTPSNVTL) overnight in R10 medium, as a control for the ELISpot assay presented in Figure 3. Dose responses curves were observed for mice immunized with Ad35.HSV.gD2. Results are depicted as spot forming units (SFU)/10<sup>6</sup> splenocytes. Dotted lines indicate the background of the assay (95<sup>th</sup> percentile of medium stimulated samples) and the horizontal lines depict the geometric mean response per group. Across

dose statistical comparison between the 1-dose vs 2-dose regimen was performed by ANOVA. Results of statistical analysis are depicted by asterisks: \* $p < 0.05$ , \*\*\*  $p < 0.001$ ; results  $p > 0.05$  (not significant) are not shown.
